# Supplementary material for: An order–disorder phase transition in the van der Waals based solvate of C60 and CClBrH2
Source: Royal Society of Chemistry journal article supplement (doi:10.1039/c8ce00271a), 2018-01-01
Supplement: c8ce00271a3.pdf [file c8ce00271a3.pdf]

### Supplementary Information of the

## An order-disorder phase transition in the van-der-Waals based Solvate of C<sub>60</sub> and CClBrH<sub>2</sub>

Jin Ye<sup>1</sup>, Maria Barrio<sup>1</sup>, René Céolin<sup>1,2</sup>, Navid Qureshi<sup>3</sup>, Philippe Negrier<sup>4</sup>, Ivo B. Rietveld<sup>5,6</sup>, Josep Lluís Tamarit<sup>1,\*</sup>

<sup>1</sup> Grup de Caracterització de Materials, Departament de Física, EEBE and Barcelona Research Center in Multiscale Science and Engineering, Universitat Politècnica de Catalunya, Av. Eduard Maristany, 10-14, 08019 Barcelona, Catalonia, Spain

<sup>2</sup> LETIAM, EA7357, IUT Orsay, Université Paris Sud, rue Noetzlin, 91405 Orsay Cedex, France

<sup>3</sup> Institut Laue Langevin, 71 avenue des Martyrs - CS 20156 - 38042 GRENOBLE CEDEX 9, France

<sup>4</sup> LOMA, UMR 5798, CNRS, Université de Bordeaux, F-33400 Talence, France

<sup>5</sup> Normandie Université, Laboratoire SMS, EA 3233, Université de Rouen, F76821 Mont Saint Aignan, France

<sup>6</sup> Université Paris Descartes, Faculté de Pharmacie, 4 avenue de l'observatoire, 75006 Paris, France

**Table 1. Crystal structure results of the Rietveld refinement for the monoclinic and hexagonal C<sub>60</sub>·2CBrClH<sub>2</sub> co-crystals**

| Chemical Formula                          | C <sub>60</sub> ·2CBrClH <sub>2</sub> | C <sub>60</sub> ·2CBrClH <sub>2</sub> |
|-------------------------------------------|---------------------------------------|---------------------------------------|
| <i>M</i> / g·mol <sup>-1</sup>            | 979.41                                | 979.41                                |
| 2θ-Angular Range                          | 9 – 70°                               | 4 – 100°                              |
| Space group                               | <i>C2/m</i>                           | <i>P6/mmm</i>                         |
| <i>a</i> / Å                              | 9.9153±0.0017                         | 10.056±0.003                          |
| <i>b</i> / Å                              | 17.412±0.004                          | 10.056±0.003                          |
| <i>c</i> / Å                              | 10.0478±0.0017                        | 10.070±0.002                          |
| α / °                                     | 90                                    | 90                                    |
| β / °                                     | 101.966± 0.009                        | 90                                    |
| γ / °                                     | 90                                    | 120                                   |
| <i>V</i> / Å <sup>3</sup>                 | 1697.0±0.6                            | 881.9±0.4                             |
| <i>Z</i> ( <i>Z'</i> )                    | 2(1/4)                                | 1 (1/24)                              |
| Temperature                               | 295 K                                 | 333 K                                 |
| <i>D<sub>x</sub></i> / g·cm <sup>-3</sup> | 1.916±0.001                           | 1.844±0.001                           |
| Wavelength (Cu Kα1)                       | λ=1.540562 Å                          | λ=1.540562 Å                          |
| 2θ-shift (zero correction)                | -0.0360±0.0013                        | 0.043± 0.008                          |
| Profile Parameters                        |                                       |                                       |
| Na                                        | 0.431±0.015                           | 0.89±0.02                             |

| Reliability Parameters                                   |                     |                    |
|----------------------------------------------------------|---------------------|--------------------|
| $R_{wp}$                                                 | 5.26%               | 4.02%              |
| $R_p$                                                    | 3.83%               | 3.09%              |
| Peak width parameters                                    |                     |                    |
| $U$                                                      | $0.479 \pm 0.035$   | $-0.5 \pm 0.3$     |
| $V$                                                      | $-0.304 \pm 0.020$  | $0.56 \pm 0.08$    |
| $W$                                                      | $0.0677 \pm 0.0028$ | $-0.029 \pm 0.006$ |
| Overall isotropic temperature factor, $U / \text{\AA}^2$ |                     |                    |
|                                                          | $0.0637 \pm 0.0013$ | $0.142 \pm 0.024$  |
| Preferred Orientation (March-Dollase)                    |                     |                    |
| $a^*$                                                    | $-0.199 \pm 0.019$  |                    |
| $b^*$                                                    | $0.746 \pm 0.024$   |                    |
| $c^*$                                                    | $0.636 \pm 0.026$   |                    |
| $R_0$                                                    | $0.917 \pm 0.007$   |                    |

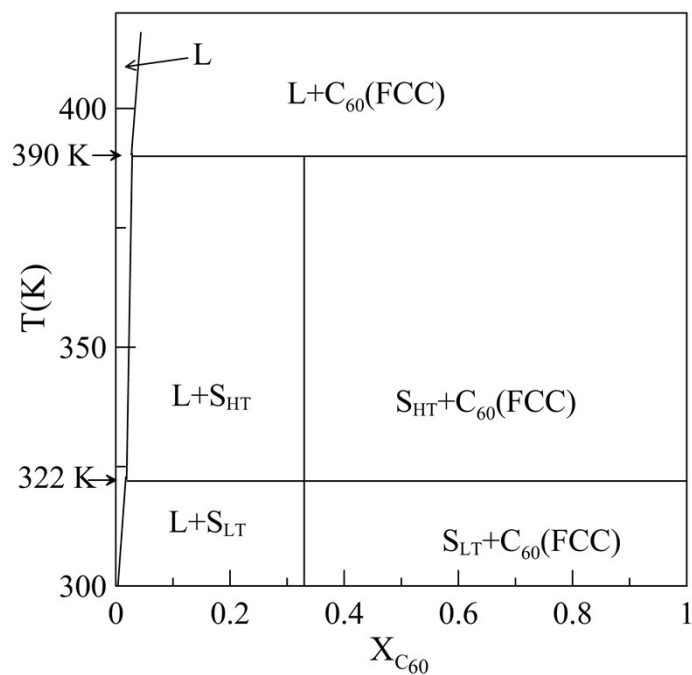

Fig. S1. C<sub>60</sub> - CBrClH<sub>2</sub> phase diagram. L: Liquid phase; C<sub>60</sub>(FCC): Face-centered cubic phase of C<sub>60</sub>; S<sub>LT</sub>: low-temperature monoclinic (C2/m) solvate; S<sub>HT</sub>: high-temperature hexagonal (P6/mmm) solvate.

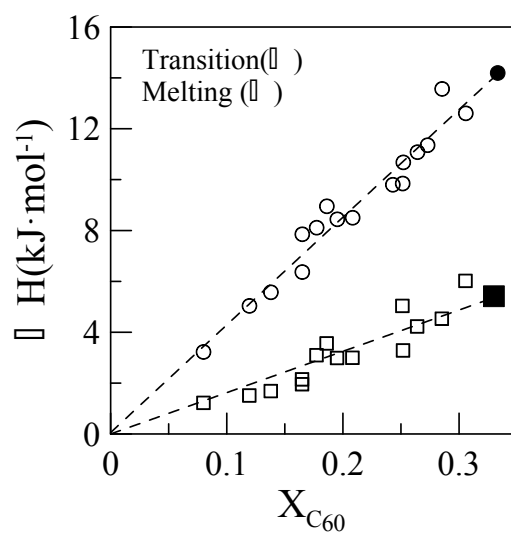

Fig. S2. Tammann diagram for the transition (empty squares) and melting (empty circles) of the  $\text{C}_{60}\cdot 2\text{CBrClH}_2$  at 322 and 390 K, respectively. Full symbols are extrapolated values at the co-crystal ( $X=1/3$ ) concentration.
